# Supplementary material for: Mass Concentration, Source and Health Risk Assessment of Volatile Organic Compounds in Nine Cities of Northeast China
Source: MDPI journal article supplement (doi:10.3390/ijerph19084915), 2022-04-18
Supplement: s1 [file s1]

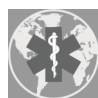

## Supplementary Materials

# Mass Concentration, Source and Health Risk Assessment of Volatile Organic Compounds in 9 Cities of Northeast China

### Supplementary Materials

**Table S1.** Comparisons of the normal concentrations of each chemical group (alkane, alkene, aromatics) measured in 9 cities of NRC in July, 2009.

| Num<br>ber | Species                         | Shen-<br>yang |      | Anshan |      | Huludao |      | Tianjin |      | Fushun |      | Chang-<br>chun |       | Jilin |           | Harbin |           | Daqing |       |
|------------|---------------------------------|---------------|------|--------|------|---------|------|---------|------|--------|------|----------------|-------|-------|-----------|--------|-----------|--------|-------|
|            |                                 | ave           | s.d  | ave    | s.d  | ave     | s.d  | ave     | s.d  | ave    | s.d  | ave            | s.d   | ave   | s.d       | ave    | s.d       | ave    | s.d   |
| 1          | n-Hexane                        | 3.44          | 3.45 | 10.31  | 3.47 | 5.63    | 3.17 | 4.77    | 4.61 | 8.92   | 5.98 | 52.86          | 32.83 | 20.35 | 11.6<br>3 | 19.23  | 10.5<br>8 | 54.78  | 38.98 |
| 2          | 2,2,4-Tri-<br>methyl<br>pentane | 0.15          | 0.25 | 0.30   | 0.20 | 0.11    | 0.01 | 0.17    | 0.00 | 0.28   | 0.23 | 0.23           | 0.08  | 0.14  | 0.02      | 0.21   | 0.08      | 1.46   | 2.45  |
| 3          | Cyclohex-<br>ane                | 3.36          | 3.72 | 2.46   | 0.39 | 1.54    | 0.67 | 1.58    | 0.77 | 0.11   | 0.00 | 10.46          | 6.34  | 4.67  | 1.71      | 4.72   | 2.15      | 14.42  | 8.98  |
| 4          | Heptane                         | 0.84          | 0.80 | 0.87   | 0.39 | 3.06    | 1.35 | 0.97    | 0.29 | 1.24   | 0.77 | 0.89           | 0.34  | 0.73  | 0.21      | 1.43   | 0.35      | 12.15  | 8.90  |
| 5          | n-Butane                        | 1.42          | 1.26 | 1.49   | 0.41 | 5.85    | 3.77 | 1.12    | 0.68 | 3.92   | 2.23 | 54.24          | 38.18 | 36.64 | 11.1<br>5 | 27.51  | 5.78      | 22.97  | 16.31 |
| 6          | Cyclopent-<br>tane              | 0.25          | 0.22 | 0.28   | 0.05 | 1.27    | 0.48 | 0.28    | 0.03 | 0.44   | 0.28 | 0.62           | 0.25  | 0.39  | 0.13      | 0.58   | 0.15      | 4.34   | 4.63  |
| 7          | n-Decane                        | 0.29          | 0.77 | 0.38   | 0.00 | 0.38    | 0.00 | 0.38    | 0.00 | 0.93   | 0.58 | 0.32           | 0.07  | 0.30  | 0.16      | 1.78   | 1.33      | 1.71   | 1.02  |
| 8          | 2,2-Dime-<br>thyl-<br>butane    | 0.26          | 0.21 | 0.08   | 0.00 | 0.08    | 0.00 | 0.08    | 0.00 | 0.42   | 0.56 | 0.75           | 0.27  | 0.44  | 0.11      | 0.60   | 0.22      | 0.35   | 0.16  |
| 9          | 2,3-Dime-<br>thyl-<br>butane    | 0.98          | 1.02 | 0.89   | 0.40 | 1.63    | 1.10 | 0.76    | 0.44 | 3.08   | 1.32 | 2.96           | 1.83  | 1.36  | 0.36      | 2.73   | 1.21      | 7.44   | 5.25  |
| 10         | 2,3-Dime-<br>thyl pen-<br>tane  | 0.88          | 0.58 | 0.93   | 0.18 | 1.46    | 0.59 | 0.84    | 0.29 | 0.96   | 0.51 | 1.47           | 0.87  | 0.89  | 0.23      | 1.51   | 0.45      | 2.71   | 1.67  |
| 11         | 2,3-Dime-<br>thyl pen-<br>tane  | 0.21          | 0.10 | 0.13   | 0.00 | 0.13    | 0.00 | 0.13    | 0.00 | 0.22   | 0.18 | 0.34           | 0.24  | 0.11  | 0.04      | 0.23   | 0.07      | 0.42   | 0.24  |
| 12         | Dodecane                        | 1.06          | 0.00 | 1.06   | 0.00 | 0.56    | 0.00 | 0.96    | 0.00 | 0.97   | 0.46 | 0.97           | 0.26  | 0.48  | 0.09      | 1.16   | 0.24      | 1.38   | 0.69  |
| 13         | Ethane                          | 2.05          | 2.09 | 5.25   | 2.02 | 9.75    | 5.07 | 5.37    | 1.38 | 6.13   | 3.56 | 5.66           | 1.67  | 6.64  | 1.53      | 9.54   | 2.61      | 65.00  | 50.64 |
| 14         | Isobutane                       | 3.39          | 3.23 | 3.33   | 1.04 | 13.86   | 7.57 | 2.87    | 2.36 | 2.78   | 2.02 | 18.08          | 16.89 | 14.69 | 9.18      | 8.70   | 3.12      | 24.49  | 10.11 |

|    |                                 |           |           |       |           |            |       |       |           |       |           |            |            |            |           |            |           |            |            |
|----|---------------------------------|-----------|-----------|-------|-----------|------------|-------|-------|-----------|-------|-----------|------------|------------|------------|-----------|------------|-----------|------------|------------|
| 15 | Isopen-<br>tane                 | 2.91      | 4.11      | 4.74  | 3.19      | 4.43       | 3.28  | 4.99  | 3.03      | 8.19  | 10.8<br>9 | 10.77      | 3.39       | 8.09       | 2.03      | 11.88      | 2.89      | 23.89      | 17.67      |
| 16 | n-Octane                        | 0.46      | 0.66      | 0.45  | 0.00      | 2.25       | 0.23  | 0.56  | 0.06      | 0.86  | 0.68      | 0.74       | 0.31       | 0.49       | 0.12      | 0.81       | 0.24      | 5.39       | 3.88       |
| 17 | n-Pentane                       | 2.29      | 1.68      | 2.39  | 0.97      | 10.27      | 7.29  | 2.05  | 0.94      | 4.21  | 5.47      | 4.73       | 1.38       | 3.02       | 0.90      | 4.48       | 1.09      | 32.12      | 26.10      |
| 18 | Methylcy-<br>clohexane          | 0.40      | 0.77      | 0.56  | 0.25      | 1.25       | 0.51  | 0.61  | 0.17      | 0.50  | 0.33      | 0.62       | 0.22       | 0.42       | 0.12      | 0.80       | 0.23      | 7.87       | 6.43       |
| 19 | Methylcy-<br>clopentane         | 0.97      | 0.71      | 1.14  | 0.31      | 1.78       | 0.96  | 0.86  | 0.27      | 1.81  | 1.35      | 2.66       | 1.10       | 1.51       | 0.27      | 2.27       | 0.73      | 8.20       | 5.68       |
| 20 | Methylhe<br>ptane               | 0.24      | 0.31      | 0.42  | 0.04      | 1.06       | 0.46  | 0.31  | 0.13      | 0.39  | 0.18      | 0.41       | 0.14       | 0.31       | 0.09      | 0.58       | 0.16      | 1.64       | 1.00       |
| 21 | Methylhe<br>ptane               | 0.26      | 0.22      | 0.28  | 0.06      | 0.62       | 0.11  | 0.28  | 0.09      | 0.38  | 0.18      | 0.39       | 0.11       | 0.20       | 0.04      | 0.42       | 0.12      | 0.84       | 0.50       |
| 22 | Methylhe<br>xane                | 0.77      | 0.55      | 0.89  | 0.14      | 1.26       | 0.53  | 0.73  | 0.25      | 1.18  | 1.72      | 1.44       | 0.81       | 0.88       | 0.22      | 1.38       | 0.42      | 2.33       | 1.39       |
| 23 | Methylhe<br>xane                | 0.94      | 1.13      | 0.87  | 0.39      | 3.06       | 1.35  | 0.97  | 0.29      | 1.21  | 0.78      | 0.95       | 0.32       | 0.64       | 0.16      | 1.51       | 0.41      | 11.58      | 9.05       |
| 24 | 2-Methyl<br>pentane             | 1.04      | 1.00      | 0.08  | 0.00      | 3.09       | 1.49  | 0.08  | 0.00      | 4.46  | 3.84      | 3.12       | 1.76       | 1.56       | 0.22      | 3.08       | 0.92      | 7.44       | 5.25       |
| 25 | 3-Methyl<br>pentane             | 1.28      | 1.06      | 0.82  | 0.14      | 1.56       | 0.91  | 1.25  | 0.30      | 1.83  | 1.21      | 4.30       | 1.99       | 1.52       | 0.50      | 2.69       | 1.03      | 6.50       | 3.74       |
| 26 | Nonane                          | 2.59      | 1.27      | 0.11  | 0.00      | 0.11       | 0.00  | 0.11  | 0.00      | 0.81  | 0.42      | 0.79       | 0.53       | 0.41       | 0.16      | 1.17       | 0.52      | 3.02       | 1.72       |
| 27 | Propane                         | 3.69      | 2.92      | 6.79  | 2.95      | 58.24      | 58.42 | 4.68  | 1.87      | 10.02 | 8.45      | 6.74       | 3.08       | 14.94      | 9.92      | 10.17      | 2.59      | 108.8<br>8 | 94.47      |
| 28 | 2,2,4-Tri-<br>methyl<br>pentane | 0.11      | 0.07      | 0.31  | 0.00      | 0.05       | 0.00  | 0.05  | 0.00      | 0.15  | 0.13      | 0.07       | 0.04       | 0.17       | 0.11      | 0.05       | 0.01      | 0.18       | 0.14       |
| 29 | n-Un-<br>decane                 | 1.47      | 1.09      | 0.35  | 0.00      | 0.38       | 0.00  | 0.72  | 0.00      | 1.08  | 0.62      | 0.67       | 0.40       | 0.37       | 0.10      | 1.66       | 1.00      | 1.42       | 0.81       |
|    | <b>Total al-<br/>kanes</b>      | 38.0<br>0 | 23.3<br>9 | 47.98 | 11.8<br>8 | 134.6<br>0 | 82.64 | 38.51 | 10.2<br>1 | 67.47 | 28.8<br>9 | 188.2<br>0 | 102.2<br>0 | 122.6<br>0 | 23.5<br>6 | 122.8<br>0 | 26.7<br>1 | 434.9<br>4 | 288.0<br>0 |
| 30 | 1,3-Buta-<br>diene              | 3.18      | 1.67      | 0.46  | 0.26      | 0.46       | 0.07  | 0.39  | 0.21      | 0.05  | 0.00      | 0.58       | 0.50       | 1.14       | 0.47      | 0.90       | 0.18      | 0.53       | 0.37       |
| 31 | Propene                         | 0.84      | 1.22      | 2.61  | 0.78      | 8.32       | 8.66  | 1.18  | 0.60      | 2.72  | 5.11      | 3.20       | 1.54       | 5.90       | 0.95      | 5.58       | 1.69      | 2.39       | 1.64       |
| 32 | ethyne                          | 1.52      | 0.92      | 4.05  | 1.52      | 2.18       | 0.32  | 1.85  | 0.77      | 4.18  | 6.25      | 3.40       | 0.69       | 4.65       | 0.86      | 5.71       | 1.35      | 2.20       | 0.74       |

|    |                                       |           |           |       |               |      |       |       |      |       |      |       |       |       |       |       |           |       |               |       |
|----|---------------------------------------|-----------|-----------|-------|---------------|------|-------|-------|------|-------|------|-------|-------|-------|-------|-------|-----------|-------|---------------|-------|
| 33 | 1-Butyl-<br>ene                       | 1.25      | 1.22      | 1.44  | 0.39          | 7.96 | 4.96  | 1.16  | 0.60 | 2.34  | 1.86 | 10.64 | 7.49  | 7.17  | 2.19  | 5.39  | 1.13      | 4.18  | 3.44          |       |
| 34 | Cis-2-bu-<br>tene                     | 0.51      | 0.57      | 0.61  | 0.21          | 2.10 | 1.26  | 0.51  | 0.30 | 1.24  | 1.71 | 4.52  | 3.43  | 2.08  | 0.68  | 2.02  | 0.49      | 1.01  | 0.74          |       |
| 35 | Trans-2-<br>butene                    | 0.57      | 0.96      | 0.79  | 0.21          | 3.23 | 1.94  | 0.54  | 0.30 | 1.10  | 1.16 | 6.74  | 5.32  | 2.73  | 0.91  | 2.65  | 0.63      | 1.41  | 1.00          |       |
| 36 | Ethene                                | 1.82      | 1.83      | 5.41  | 2.46          | 3.71 | 1.83  | 2.06  | 0.61 | 5.65  | 6.18 | 4.96  | 1.57  | 7.45  | 1.03  | 7.07  | 2.61      | 3.89  | 2.24          |       |
| 37 | 1-hexene                              | 3.01      | 10.9<br>6 | 0.49  | 0.08          | 3.39 | 1.60  | 1.03  | 0.00 | 6.70  | 4.85 | 24.15 | 30.03 | 0.53  | 0.20  | 0.96  | 0.23      | 11.30 | 9.02          |       |
| 38 | Isoprene                              | 0.28      | 0.47      | 0.64  | 0.30          | 0.63 | 0.24  | 0.58  | 0.30 | 3.64  | 2.51 | 2.64  | 2.54  | 3.41  | 1.53  | 5.04  | 1.01      | 2.87  | 1.72          |       |
| 39 | 1-Pentene                             | 1.14      | 1.03      | 0.86  | 0.85          | 3.98 | 2.54  | 0.61  | 0.59 | 0.72  | 0.61 | 0.59  | 0.25  | 0.75  | 0.42  | 0.96  | 0.23      | 0.58  | 0.41          |       |
| 40 | Cis-2-pen-<br>tene                    | 0.51      | 0.76      | 0.62  | 0.40          | 0.40 | 0.17  | 0.34  | 0.22 | 0.62  | 0.64 | 0.63  | 0.27  | 0.64  | 0.14  | 1.34  | 0.35      | 0.77  | 0.72          |       |
| 41 | Trans-2-<br>pentene                   | 0.46      | 1.12      | 0.53  | 0.45          | 1.91 | 1.11  | 0.29  | 0.25 | 0.56  | 0.68 | 0.47  | 0.28  | 0.81  | 0.27  | 2.25  | 0.58      | 1.12  | 1.05          |       |
|    | <b>Total al-<br/>kenes</b>            | 15.1<br>7 | 12.3<br>1 |       | 6.54<br>19.19 |      | 38.75 | 22.09 |      | 11.20 | 4.36 | 30.98 | 2.44  | 63.67 | 32.49 | 38.97 | 6.46      | 41.27 | 7.19<br>35.49 | 10.46 |
| 42 | Benzene                               | 4.12      | 2.50      | 6.43  | 2.67          | 6.39 | 2.36  | 5.45  | 2.23 | 14.10 | 6.48 | 8.73  | 3.08  | 5.46  | 1.31  | 10.61 | 4.28      | 6.62  | 4.47          |       |
| 43 | Toluene                               | 7.65      | 4.14      | 15.60 | 2.68          | 6.53 | 1.41  | 15.82 | 9.31 | 9.25  | 4.08 | 53.04 | 25.33 | 27.75 | 6.50  | 28.66 | 11.3<br>0 | 27.79 | 20.53         |       |
| 44 | Ethylben-<br>zene                     | 2.10      | 1.28      | 2.73  | 1.07          | 2.38 | 1.09  | 3.71  | 3.73 | 2.06  | 1.53 | 9.53  | 8.02  | 4.19  | 1.14  | 4.59  | 1.34      | 2.64  | 1.13          |       |
| 45 | Phe-<br>nyleth-<br>ylene              | 0.43      | 0.53      | 0.68  | 0.15          | 0.47 | 0.21  | 0.67  | 0.21 | 1.45  | 1.46 | 1.15  | 0.67  | 1.71  | 0.63  | 1.40  | 0.39      | 3.23  | 4.87          |       |
| 46 | p-Xylene                              | 1.75      | 0.83      | 2.37  | 0.81          | 1.26 | 0.50  | 3.09  | 2.80 | 1.64  | 1.23 | 4.23  | 2.75  | 2.74  | 0.83  | 3.42  | 1.02      | 2.03  | 1.00          |       |
| 47 | m-Xylene                              | 1.75      | 0.83      | 2.73  | 1.07          | 1.26 | 0.50  | 3.09  | 2.80 | 1.64  | 1.23 | 4.23  | 2.75  | 2.74  | 0.83  | 3.42  | 1.02      | 2.03  | 1.00          |       |
| 48 | o-xylene                              | 1.05      | 0.66      | 1.56  | 0.58          | 1.09 | 0.38  | 1.91  | 1.85 | 1.42  | 0.96 | 2.82  | 1.79  | 2.08  | 0.66  | 2.75  | 0.80      | 1.18  | 0.58          |       |
| 49 | 4-Ethyltol-<br>uene                   | 0.31      | 0.54      | 3.20  | 0.50          | 0.71 | 0.08  | 6.29  | 6.51 | 0.05  | 0.00 | 2.37  | 1.97  | 4.27  | 1.76  | 3.50  | 1.10      | 1.19  | 0.82          |       |
| 50 | 1,2,4-Tri-<br>me-<br>thylben-<br>zene | 0.49      | 0.54      | 1.09  | 0.47          | 0.43 | 0.00  | 5.44  | 4.39 | 1.24  | 0.82 | 0.61  | 0.26  | 1.43  | 0.71  | 1.19  | 0.27      | 0.33  | 0.26          |       |
| 51 | 1,3,5-Tri-<br>me-<br>thylben-<br>zene | 0.30      | 0.54      | 2.20  | 0.36          | 0.32 | 0.00  | 2.80  | 2.10 | 0.44  | 0.43 | 1.25  | 0.84  | 1.40  | 0.67  | 1.39  | 0.30      | 0.38  | 0.27          |       |

|    |                        |       |       |        |       |        |        |        |       |        |       |        |        |        |       |        |       |        |        |
|----|------------------------|-------|-------|--------|-------|--------|--------|--------|-------|--------|-------|--------|--------|--------|-------|--------|-------|--------|--------|
|    | Iso-                   |       |       |        |       |        |        |        |       |        |       |        |        |        |       |        |       |        |        |
| 52 | propylbenzene          | 0.23  | 0.17  | 0.80   | 0.00  | 0.80   | 0.00   | 0.50   | 0.00  | 0.19   | 0.13  | 0.67   | 0.60   | 1.68   | 1.09  | 1.07   | 0.60  | 0.11   | 0.06   |
| 53 | 1,3-Diethylbenzene     | 0.26  | 1.73  | 0.12   | 0.00  | 0.12   | 0.00   | 0.62   | 0.00  | 0.70   | 0.61  | 0.34   | 0.28   | 0.26   | 0.07  | 0.50   | 0.12  | 0.18   | 0.09   |
| 54 | 1,4-Diethylbenzene     | 0.44  | 1.62  | 0.12   | 0.00  | 0.12   | 0.00   | 0.29   | 0.00  | 0.78   | 0.69  | 0.78   | 0.32   | 0.90   | 0.43  | 0.89   | 0.30  | 0.46   | 0.18   |
| 55 | o-Ethyltoluene         | 0.24  | 0.41  | 0.28   | 0.00  | 0.14   | 0.00   | 1.07   | 0.69  | 0.42   | 0.38  | 0.63   | 0.57   | 0.73   | 0.33  | 0.76   | 0.23  | 0.20   | 0.12   |
| 56 | m-Ethyltoluene         | 0.40  | 0.38  | 1.48   | 0.18  | 0.32   | 0.00   | 2.04   | 1.34  | 0.65   | 0.48  | 1.48   | 1.20   | 1.32   | 0.52  | 1.41   | 0.41  | 0.43   | 0.32   |
| 57 | n-Propylbenzene        | 0.23  | 0.25  | 0.38   | 0.00  | 0.12   | 0.00   | 0.71   | 0.33  | 0.32   | 0.27  | 0.74   | 0.85   | 0.46   | 0.23  | 0.52   | 0.14  | 0.15   | 0.09   |
| 58 | 1,2,3-Triethylbenzene  | 0.28  | 0.75  | 0.74   | 0.16  | 0.11   | 0.00   | 1.10   | 0.96  | 0.61   | 0.62  | 0.53   | 0.37   | 0.91   | 0.42  | 1.01   | 0.30  | 0.32   | 0.15   |
|    | <b>Total aromatics</b> | 22.03 | 11.70 | 42.51  | 9.85  | 22.57  | 5.87   | 54.60  | 2.27  | 36.98  | 14.41 | 93.14  | 48.64  | 60.06  | 10.87 | 67.07  | 16.52 | 49.25  | 32.61  |
|    | <b>Total VOCs</b>      | 75.20 | 40.09 | 109.68 | 23.27 | 195.92 | 103.26 | 104.31 | 46.04 | 135.43 | 46.01 | 345.01 | 170.52 | 221.63 | 34.32 | 231.14 | 46.69 | 519.68 | 309.88 |

ave means average concentration, s.d means standard deviation.

**Table S2.** Correlation coefficient ( $R^2$ ) of the identified VOCs with ethyne and i-pentane for the 9 cities sampled, and benzene to toluene ratio (B/T) in 9 cities of NRC.

| $R^2$                   | Shenyang   |             | Tianjin    |             | Anshan     |             | Huludao    |             | Changchun  |             | Jilin      |             | Harbin     |             | Daqing     |             |
|-------------------------|------------|-------------|------------|-------------|------------|-------------|------------|-------------|------------|-------------|------------|-------------|------------|-------------|------------|-------------|
| Species                 | Iso-ethyne | Iso-pentane |
| 1,3-Butadiene           | 0.538      | 0.164       | 0.177      | 0.672       | 0.839      | 0.697       | -0.188     | 0.42        | 0.725      | 0.758       | 0.245      | 0.77        | 0.664      | 0.608       | 0.759      | 0.879       |
| n-Hexane                | 0.11       | 0.175       | -0.297     | -0.397      | -0.438     | -0.265      | -0.042     | 0           | 0.771      | 0.831       | 0.147      | -0.59       | 0.576      | 0.337       | 0.854      | 0.646       |
| Benzene                 | 0.387      | 0.125       | 0.871      | 0.704       | 0.519      | 0.043       | 0.156      | 0.588       | 0.85       | 0.885       | 0.252      | 0.554       | 0.332      | 0.455       | 0.857      | 0.424       |
| 2,2,4-Trimethyl pentane | 0.579      | 0.29        | 0.057      | 0.571       | 0.853      | 0.77        | -0.213     | 0.762       | 0.962      | 0.972       | 0.75       | 0.9         | 0.286      | 0.619       | 0.4        | 0.896       |
| Toluene                 | 0.593      | 0.448       | 0.838      | 0.576       | -0.23      | -0.215      | 0.435      | -0.17       | 0.788      | 0.826       | 0.269      | -0.185      | 0.762      | 0.508       | 0.835      | 0.559       |
| Ethylbenzene            | 0.331      | 0.103       | 0.966      | 0.743       | 0.675      | 0.003       | 0.044      | 0.468       | 0.739      | 0.722       | 0.285      | 0.73        | 0.909      | 0.821       | 0.83       | 0.629       |
| Phenylethylene          | 0.066      | 0.049       | 0.562      | 0.68        | 0.263      | -0.435      | -0.095     | 0.502       | 0.83       | 0.887       | 0.232      | 0.676       | 0.885      | 0.602       | 0.485      | 0.904       |
| p-Xylene                | 0.219      | 0.195       | 0.964      | 0.772       | 0.767      | 0.136       | 0.148      | 0.431       | 0.797      | 0.843       | 0.171      | 0.712       | 0.926      | 0.711       | 0.832      | 0.623       |
| m-Xylene                | 0.219      | 0.195       | 0.964      | 0.772       |            |             | 0.148      | 0.431       | 0.797      | 0.843       | 0.171      | 0.712       | 0.926      | 0.711       | 0.832      | 0.623       |
| o-xylene                | 0.384      | 0.223       | 0.947      | 0.715       | 0.799      | 0.196       | 0.306      | 0.248       | 0.832      | 0.854       | 0.3        | 0.696       | 0.716      | 0.751       | 0.913      | 0.662       |
| Cyclohexane             | 0.537      | 0.528       | -0.13      | -0.162      | -0.403     | -0.368      | -0.052     | 0.461       | 0.778      | 0.824       | 0.225      | -0.454      | 0.667      | 0.425       | 0.746      | 0.887       |
| 4-Ethyltoluene          | 0.369      | 0.102       |            |             |            |             |            |             |            |             |            |             |            |             |            |             |
| Heptane                 | 0.319      | 0.477       | 0.662      | 0.531       | 0.336      | -0.374      | -0.154     | 0.544       | 0.904      | 0.938       | 0.55       | 0.868       | 0.938      | 0.876       | 0.345      | 0.826       |
| Propene                 | 0.388      | 0.069       | 0.035      | 0.384       | 0.406      | 0.472       | -0.134     | 0.48        | 0.899      | 0.838       | 0.77       | 0.825       | 0.433      | 0.63        | 0.788      | 0.867       |
| 1,2,4-Trimethylbenzene  | 0.382      | 0.356       |            |             |            |             |            |             |            |             |            |             |            |             |            |             |
| 1,3,5-Trimethylbenzene  | 0.378      | 0.097       |            |             |            |             |            |             |            |             |            |             |            |             |            |             |
| Iso-propylbenzene       | 0.06       | 0.136       | 0.939      | 0.598       |            |             |            |             | 0.751      | 0.745       | 0.531      | 0.476       | 0.38       | 0.685       | 0.884      | 0.768       |
| Acetylene               | -          | 0.117       | -          | 0.766       | -          | 0.732       | -          | -0.361      | -          | 0.947       | -          | 0.543       | -          | 0.853       | -          | 0.683       |

[illegible]

|                        |       |       |       |       |       |       |        |       |       |       |        |       |       |       |       |       |
|------------------------|-------|-------|-------|-------|-------|-------|--------|-------|-------|-------|--------|-------|-------|-------|-------|-------|
| n-Pentane              | 0.387 | 0.541 | 0.747 | 0.895 | 0.721 | 0.208 | -0.127 | 0.174 | 0.93  | 0.934 | 0.686  | 0.885 | 0.886 | 0.99  | 0.43  | 0.945 |
| 1-Pentene              | 0.603 | 0.374 | 0.106 | 0.562 | 0.636 | 0.546 | -0.015 | -     | 0.923 | 0.968 | 0.536  | 0.857 | 0.787 | 0.968 | 0.839 | 0.316 |
|                        |       |       |       |       |       |       |        | 0.127 |       |       |        |       |       |       |       |       |
| Methylcyclohexane      | 0.531 | 0.569 | 0.733 | 0.587 | 0.283 | -0.42 | -0.123 | 0.579 | 0.948 | 0.964 | 0.658  | 0.958 | 0.899 | 0.989 | 0.293 | 0.833 |
| Methylcyclopentane     | 0.548 | 0.552 | 0.514 | 0.356 | 0.554 | -     | -0.116 | 0.368 | 0.952 | 0.947 | 0.568  | 0.605 | 0.885 | 0.872 | 0.495 | 0.902 |
|                        |       |       |       |       |       | 0.105 |        |       |       |       |        |       |       |       |       |       |
| 2-Methylheptane        | 0.623 | 0.448 |       |       |       |       |        |       |       |       |        |       |       |       |       |       |
| 3-Methylheptane        | 0.651 | 0.446 |       |       |       |       |        |       |       |       |        |       |       |       |       |       |
| 2-Methylhexane         | 0.697 | 0.465 | 0.758 | 0.706 | 0.88  | 0.387 | -0.044 | 0.356 | 0.839 | 0.8   | 0.528  | 0.909 | 0.929 | 0.93  | 0.616 | 0.918 |
| 3-Methylhexane         | 0.545 | 0.464 | 0.662 | 0.531 | 0.336 | -     | -0.154 | 0.544 | 0.959 | 0.958 | 0.645  | 0.968 | 0.911 | 0.973 | 0.311 | 0.835 |
|                        |       |       |       |       |       | 0.374 |        |       |       |       |        |       |       |       |       |       |
| 2-Methylpentane        | 0.543 | 0.563 |       |       |       |       | 0.012  | -     | 0.871 | 0.888 | 0.901  | 0.656 | 0.818 | 0.942 | 0.606 | 0.893 |
|                        |       |       |       |       |       |       |        | 0.215 |       |       |        |       |       |       |       |       |
| 3-Methylpentane        | 0.598 | 0.495 | 0.062 | -     | -0.34 | -     | -0.149 | 0.482 | 0.92  | 0.924 | 0.099  | -0.1  | 0.598 | 0.757 | 0.779 | 0.895 |
|                        |       |       |       | 0.342 |       | 0.184 |        |       |       |       |        |       |       |       |       |       |
| Nonane                 | 0.237 | 0.201 |       |       |       |       |        |       | 0.806 | 0.9   | 0.364  | 0.758 | 0.686 | 0.902 | 0.348 | 0.835 |
| Cis-2-pentene          | 0.094 | 0.845 | 0.581 | 0.848 | 0.791 | 0.775 | 0.146  | 0.798 | 0.884 | 0.963 | 0.679  | 0.883 | 0.761 | 0.968 | 0.872 | 0.356 |
| Trans-2-pentene        | 0.218 | 0.672 | 0.266 | 0.679 | 0.648 | 0.583 | -0.043 | -0.1  | 0.809 | 0.777 | 0.594  | 0.756 | 0.765 | 0.97  | 0.897 | 0.422 |
| Propane                | 0.641 | 0.15  | 0.942 | 0.871 | 0.355 | -     | -0.178 | 0.93  | 0.852 | 0.815 | 0.062  | 0.348 | 0.761 | 0.646 | 0.319 | 0.797 |
|                        |       |       |       |       |       | 0.076 |        |       |       |       |        |       |       |       |       |       |
| n-Propylbenzene        | 0.338 | -     | 0.905 | 0.629 |       |       |        |       | 0.623 | 0.463 | -0.707 | 0.541 | 0.776 | 0.938 | 0.857 | 0.563 |
|                        |       | 0.018 |       |       |       |       |        |       |       |       |        |       |       |       |       |       |
| 1,2,3-Trimethylbenzene | 0.285 | -     | 0.993 | 0.841 |       |       |        |       | 0.823 | 0.818 | -0.768 | 0.371 | 0.401 | 0.928 | 0.875 | 0.671 |
|                        |       | 0.004 |       |       |       |       |        |       |       |       |        |       |       |       |       |       |
| 2,2,4-Trimethylpentane | 0.627 | 0.04  |       |       |       |       |        |       | 0.861 | 0.897 | -0.498 | 0.368 | 0.855 | 0.878 | 0.223 | 0.867 |
| n-Undecane             | 0.031 | -     |       |       |       |       |        |       | 0.725 | 0.727 | -0.784 | 0.167 | 0.106 | 0.65  | 0.381 | 0.901 |
|                        |       | 0.256 |       |       |       |       |        |       |       |       |        |       |       |       |       |       |
| B/T                    | 0.54  |       | 0.44  |       | 0.41  |       | 0.98   |       | 0.16  |       | 0.2    |       | 0.37  |       | 0.24  |       |

**Table S3.** Source apportionment of VOCs at Shenyang by PCA

| species                | Factor |       |       |        |        |
|------------------------|--------|-------|-------|--------|--------|
|                        | 1      | 2     | 3     | 4      | 5      |
| 1,3-Butadiene          |        | 0.873 |       | 0.308  |        |
| Benzene                | -0.324 | 0.621 | 0.348 |        | 0.506  |
| Toluene                | -0.389 | 0.306 | 0.462 |        | 0.532  |
| Ethylbenzene           |        |       | 0.826 |        | 0.403  |
| Phenylethylene         |        |       | 0.942 |        |        |
| p,m-Xylene             | 0.459  |       | 0.8   |        |        |
| o-Xylene               |        |       | 0.859 |        |        |
| Cyclohexane            |        |       |       |        | 0.738  |
| 4-Ethyltoluene         |        | 0.838 |       |        |        |
| Heptane                |        |       | 0.889 |        |        |
| Propene                | 0.815  |       |       |        |        |
| 1,3,5-Trimethylbenzene | 0.386  | 0.504 |       | -0.366 | 0.343  |
| Isopropylbenzene       | 0.97   |       |       |        |        |
| Acetylene              | 0.963  |       |       |        |        |
| n-Butane               | 0.94   |       |       |        |        |
| 1-Butylene             |        |       | 0.584 | 0.504  |        |
| Cis-2-Butene           | 0.537  |       |       | 0.718  |        |
| Trans-2-Butene         |        | 0.58  | 0.587 |        |        |
| n-Decane               | 0.899  |       |       |        |        |
| 2,3-Dimethyl pentane   |        | 0.606 |       | 0.627  |        |
| 2,3-Dimethyl pentane   | 0.952  |       |       |        |        |
| Dodecane               | 0.713  | 0.35  |       |        |        |
| Ethane                 | 0.539  | 0.586 |       |        |        |
| 1-Hexene               | 0.825  |       |       |        |        |
| Isobutane              | 0.962  |       |       |        |        |
| Isopentane             |        | 0.314 | 0.7   |        | 0.33   |
| Isoprene               |        |       |       | 0.689  |        |
| n-Octane               |        | 0.482 | 0.479 | 0.46   | -0.434 |
| n-Pentane              |        | 0.678 |       |        |        |
| 1-Pentene              | 0.917  |       |       |        |        |
| 3-Methylhexane         |        | 0.702 |       | 0.493  |        |
| 2-Methyl pentane       |        |       |       | 0.868  |        |
| 3-Methyl pentane       |        |       |       | 0.833  |        |
| Cis-2-Pentene          | 0.943  |       |       |        |        |
| Trans-2-Pentene        | 0.968  |       |       |        |        |



|                    |        |        |        |        |        |
|--------------------|--------|--------|--------|--------|--------|
| Propane            |        | 0.855  |        |        |        |
| n-Propylbenzene    | 0.688  |        |        |        | -0.493 |
| Initial eigenvalue | 12.387 | 6.598  | 5.112  | 3.631  | 1.891  |
| % of variance      | 33.477 | 17.832 | 13.816 | 9.812  | 5.11   |
| Cumulative%        | 33.477 | 51.31  | 65.126 | 74.938 | 80.048 |

**Table S4.** Source apportionment of VOCs at Tianjin by PCA

| species                | Factor |       |       |       |       |       |
|------------------------|--------|-------|-------|-------|-------|-------|
|                        | 1      | 2     | 3     | 4     | 5     | 6     |
| 1,3-Butadiene          |        | 0.934 |       |       |       |       |
| Benzene                | 0.414  | 0.592 | 0.509 |       |       |       |
| Toluene                | 0.447  |       | 0.549 |       | 0.399 |       |
| Ethylbenzene           |        |       | 0.94  |       |       |       |
| Phenylethylene         |        |       | 0.925 |       |       |       |
| p-Xylene               |        |       | 0.959 |       |       |       |
| m-Xylene               |        |       | 0.948 |       |       |       |
| o-xylene               | 0.332  |       | 0.682 | 0.319 | 0.452 |       |
| Cyclohexane            | 0.408  |       | 0.546 |       | 0.301 | 0.545 |
| 4-Ethyltoluene         |        | 0.881 |       |       |       |       |
| Heptane                | 0.704  | 0.432 | 0.485 |       |       |       |
| Propene                |        | 0.885 |       |       |       |       |
| 1,2,4-Trimethylbenzene | 0.805  |       |       |       | 0.409 |       |
| Isopropylbenzene       | 0.384  |       |       |       | 0.682 |       |
| Acetylene              |        | 0.898 |       |       |       |       |
| n-Butane               | 0.314  |       |       |       |       | 0.915 |
| 1-Butylene             |        |       |       |       |       | 0.877 |
| Cis-2-butene           |        |       |       | 0.917 |       |       |
| Cyclopentane           |        |       |       | 0.856 |       |       |
| n-Decane               | 0.9    |       |       |       |       |       |
| 1,4-Diethylbenzene     | 0.362  |       |       | 0.771 |       |       |
| 2,3-Dimethyl pentane   | 0.61   | 0.471 |       |       | 0.349 | 0.323 |
| Ethane                 |        | 0.936 |       |       |       |       |
| Ethene                 |        | 0.905 |       |       |       |       |
| o-Ethyltoluene         | 0.546  |       |       |       | 0.663 |       |
| m-Ethyltoluene         | 0.577  | 0.345 | 0.384 |       | 0.513 |       |
| 1-hexene               |        |       |       |       |       | 0.896 |
| Isobutane              | 0.77   |       |       |       |       | 0.567 |
| Isopentane             | 0.838  |       | 0.439 |       |       |       |
| Isoprene               |        |       |       | 0.875 |       |       |
| n-Octane               | 0.68   | 0.461 |       | 0.365 | 0.327 |       |
| n-Pentane              | 0.924  |       |       |       |       |       |
| 1-Pentene              | 0.55   | 0.355 |       | 0.614 |       |       |
| Methylcyclohexane      | 0.76   | 0.491 |       |       |       |       |

|                        |        |        |        |        |        |        |
|------------------------|--------|--------|--------|--------|--------|--------|
| Methylcyclopentane     | 0.527  | 0.497  |        | 0.42   | 0.39   |        |
| 2-Methylhexane         | 0.886  | 0.303  |        |        |        |        |
| 3-Methylhexane         | 0.592  | 0.539  |        | 0.454  |        |        |
| 3-Methyl pentane       |        |        |        | 0.453  | 0.642  |        |
| Nonane                 | 0.905  |        |        |        |        |        |
| Cis-2-pentene          | 0.751  |        |        | 0.455  |        |        |
| Propane                |        | 0.946  |        |        |        |        |
| n-Propylbenzene        |        |        |        |        | 0.779  |        |
| 1,2,3-Trimethylbenzene | 0.623  |        | 0.307  |        | 0.442  |        |
| n-Undecane             | 0.927  |        |        |        |        |        |
| Initial eigenvalue     | 19.988 | 7.001  | 4.626  | 3.275  | 2.253  | 1.581  |
| % of variance          | 45.426 | 15.912 | 10.513 | 7.443  | 5.122  | 3.593  |
| Cumulative%            | 45.426 | 61.338 | 71.852 | 79.294 | 84.416 | 88.009 |
